# Supplementary material
Source: Research Square preprint supplement (doi:10.21203/rs.3.rs-10325161/v1)
Supplement: Supplementary file 1 [file d5c4feed2539e38ca8923bd0.docx]

**Table 1**. Comparison of the characteristics

|  | Control group  (n=30) | Study group  (n=30) | X2/t/z | P |
| --- | --- | --- | --- | --- |
| Gender (%) |  |  | 0.000 | 1.000 |
| Male | 19(63.33) | 19(63.33) |  |  |
| Female | 11(36.67) | 11(36.67) |  |  |
| Age (years) | 58.87±7.14 | 60.57±5.86 | -1.008 | 0.318 |
| BMI (kg/m2) | 22.03±2.67 | 22.01±2.85 | 0.023 | 0.981 |
| Smoking history (%) |  |  | 0.271 | 0.602 |
| No | 16(53.33) | 18(60.00) |  |  |
| Yes | 14(46.67) | 12(40.00) |  |  |
| History of alcohol consumption (%) |  |  | 1.364 | 0.243 |
| No | 20(66.67) | 24(80.00) |  |  |
| Yes | 10(33.33) | 6(20.00) |  |  |
| Primary disease (%) |  |  |  |  |
| Septicemia | 11(36.67) | 6(20.00) | 2.052 | 0.152 |
| Severe pneumonia | 7(23.33) | 12(40.00) | 1.926 | 0.165 |
| Acute heart failure | 4(13.33) | 1(3.33) | 0.873 | 0.350 |
| AECOPD | 3(10.00) | 7(23.33) | 1.920 | 0.166 |
| Acute pancreatitis | 4(13.33) | 3(10.00) | 0.000 | 1.000 |
| Upper gastrointestinal bleeding | 1(3.33) | 1(3.33) | 0.000 | 1.000 |
| Underlying Disease (%) |  |  |  |  |
| Diabetes | 13(43.33) | 9(30.000) | 1.148 | 0.284 |
| High blood pressure | 13(43.33) | 16(53.33) | 0.601 | 0.438 |
| COPD | 4(13.33) | 7(23.33) | 1.002 | 0.317 |
| Hyperlipidemia | 4(13.33) | 1(3.33) | 0.870 | 0.350 |
| Coronary heart disease | 5(16.67) | 5(16.67) | 0.000 | 1.000 |
| SOFA score (points) | 9(4,13) | 8.5(4,10) | -0.469 | 0.639 |
| APACHE-II score (points) | 17.20±2.86 | 16.47±2.75 | 1.013 | 0.315 |
| NRS-2002 score (points) | 4(4,5) | 4(3,5) | -0.971 | 0.332 |
| Caloric intake/target energy ratio (%) | 74.84±1.48 | 74.93±2.34 | -0.169 | 0.867 |
| Protein intake (g/d) | 1.35(1.3,1.4) | 1.4(1.3,1.5) | -1.602 | 0.109 |
| Current albumin index (g/L) | 27.38±1.24 | 27.60±1.60 | -0.590 | 0.557 |
| Length of sedation (days) | 7(6,9) | 6.5(5,8) | -1.667 | 0.096 |
| Length of mechanical ventilation (days) | 9.5(7,14) | 10(7,13) | -0.351 | 0.726 |
| Ventilator parameters |  |  |  |  |
| Pressure support (cmH2O) | 9.5(8,11) | 9.5(8,12) | -0.733 | 0.463 |
| PEEP (cmH2O) | 4(3,5) | 4(3,5) | -0.123 | 0.902 |
| Use of special drugs (%) |  |  |  |  |
| Polymyxin B | 7(23.33) | 5(16.67) | 0.417 | 0.519 |
| Imipenem cilastatin | 10(33.33) | 8(26.67) | 0.317 | 0.573 |
| Vancomycin | 3(10.00) | 6(20.00) | 0.523 | 0.470 |
| Levosimendan | 11(36.67) | 15(50.00) | 1.086 | 0.297 |
| Cedilanid | 11(36.67) | 8(26.67) | 0.693 | 0.405 |
| Specialized therapeutic measures (%) |  |  |  |  |
| Thoracentesis | 5(16.67) | 4(13.33) | 0.000 | 1.000 |
| Abdominal puncture | 3(10.00) | 2(6.67) | 0.000 | 1.000 |
| Prone position ventilation | 4(13.33) | 5(16.67) | 0.000 | 1.000 |
| Tracheotomy | 7(23.33) | 8(26.67) | 0.089 | 0.766 |

Note: AECOPD=acute exacerbations of chronic obstructive pulmonary disease. APACHE-II=acute physiology and chronic health evaluation. BMI=body mass index. COPD=chronic obstructive pulmonary disease. NRS=nutrition risk screening. PEEP=positive end-expiratory pressure. SOFA=sequential organ failure assessment.

**Table 2**. Comparison of PO2 (mmHg)

|  | n | Pre-  intervention | Day-1 | Day-5 | Day-7 | Day-10 | the day of successful weaning/Day-28 |
| --- | --- | --- | --- | --- | --- | --- | --- |
| Control group | 30 | 81.43±7.89 | 81.73±8.37 | 81.47±8.51 | 81.13±8.72 | 81.26±10.42 | 82.46±7.85 |
| Study group | 30 | 81.90±7.13 | 82.27±7.83 | 81.90±8.94 | 81.08±9.01 | 81.00±6.91 | 81.78±9.92 |
| t |  | -0.240 | -0.255 | -0.192 | 0.022 | 0.072 | 0.278 |
| P |  | 0.811 | 0.800 | 0.848 | 0.982 | 0.943 | 0.782 |

Note: PO2=partial pressure of oxygen.

**Table 3**. Comparison of PCO2 (mmHg)

|  | n | Pre-  intervention | Day-1 | Day-5 | Day-7 | Day-10 | the day of successful weaning/Day-28 |
| --- | --- | --- | --- | --- | --- | --- | --- |
| Control group | 30 | 38(36,40) | 38(38,38) | 38(38,38) | 39(37,39) | 38(37,40) | 38(38,39) |
| Study group | 30 | 38.5(38,40) | 38(38,39) | 38(38,39) | 38(38,41) | 39(38,40) | 39(38,39) |
| z |  | -1.682 | -0.95 | -0.761 | -0.191 | -0.336 | -1.374 |
| P |  | 0.093 | 0.342 | 0.447 | 0.849 | 0.737 | 0.169 |

Note: PCO2=partial pressure of carbon dioxide.

**Table 4**. Comparison of oxygenation index

|  | n | Pre-  intervention | Day-1 | Day-5 | Day-7 | Day-10 | the day of successful weaning/Day-28 |
| --- | --- | --- | --- | --- | --- | --- | --- |
| Control group | 30 | 233.07±25.45 | 234.10±26.96 | 235.80±27.05 | 234.77±27.94 | 234.25±31.77 | 234.15±29.01 |
| Study group | 30 | 235.50±24.71 | 236.60±26.48 | 236.07±29.05 | 234.16±25.79 | 235.00±20.56 | 233.59±25.63 |
| t |  | -0.376 | -0.362 | -0.037 | 0.083 | 0.065 | 0.075 |
| P |  | 0.709 | 0.718 | 0.971 | 0.934 | 0.949 | 0.941 |

**Table 5**. Comparison of tidal volume

|  | n | Pre-  intervention | Day-1 | Day-5 | Day-7 | Day-10 | the day of successful weaning/Day-28 |
| --- | --- | --- | --- | --- | --- | --- | --- |
| Control group | 30 | 260.87±5.06 | 267.70±5.98* | 273.87±11.99* | 282.67±7.77* | 293.35±4.87* | 305.65±20.39* |
| Study group | 30 | 262.43±7.61 | 269.37±7.71* | 277.17±9.19* | 286.72±9.36* | 308.00±48.05* | 312.37±18.41* |
| t |  | -0.939 | -0.936 | -1.196 | -1.755 | -1.357 | -1.260 |
| P |  | 0.352 | 0.353 | 0.236 | 0.085 | 0.183 | 0.214 |

Note: *P<0.05 for each time point within the group compared to baseline.

**Table 6**. Comparison of respiratory rate

|  | n | Pre-  intervention | Day-1 | Day-5 | Day-7 | Day-10 | the day of successful weaning/Day-28 |
| --- | --- | --- | --- | --- | --- | --- | --- |
| Control group | 30 | 24(22,24) | 24(24,26) | 24(23,26) | 24(24,25) | 23.5(22.5,25) | 24(24,25) |
| Study group | 30 | 23(22,25) | 25(23,27) | 24.5(23,26) | 25(24,26) | 25(24,25) | 25(24,25) |
| z |  | -0.361 | -0.272 | -0.602 | -1.364 | -1.193 | -1.531 |
| P |  | 0.718 | 0.786 | 0.547 | 0.173 | 0.233 | 0.126 |

**Table 7.** Comparison of lung compliance

|  | n | Pre-  intervention | Day-1 | Day-5 | Day-7 | Day-10 | the day of successful weaning/Day-28 |
| --- | --- | --- | --- | --- | --- | --- | --- |
| Control group | 30 | 47.10±6.81 | 47.67±6.14 | 47.57±4.52 | 47.37±3.67 | 47.95±4.20 | 47.04±4.25 |
| Study group | 30 | 47.97±5.31 | 47.10±4.28 | 47.60±4.13 | 48.12±3.43 | 48.44±3.00 | 47.73±3.57 |
| t |  | -0.550 | 0.415 | -0.030 | -0.780 | -0.317 | -0.601 |
| P |  | 0.585 | 0.680 | 0.976 | 0.439 | 0.754 | 0.551 |

**Table 8.** Comparison of MIP

|  | n | Pre-  intervention | Day-1 | Day-5 | Day-7 | Day-10 | the day of successful weaning/Day-28 |
| --- | --- | --- | --- | --- | --- | --- | --- |
| Control group | 30 | 15.37±2.48 | 16.00±2.94* | 18.00±4.58* | 21.50±6.75* | 23.71±7.71* | 27.65±8.27* |
| Study group | 30 | 16.03±2.59 | 18.37±4.43* | 22.21±6.97* | 26.50±8.21* | 29.52±8.00* | 33.52±8.00* |
| t |  | -1.017 | -2.439 | -2.749 | -2.290 | -2.532 | -2.625 |
| P(ITT) |  | 0.313 | 0.018 | 0.008 | 0.027 | 0.015 | 0.011 |
| P(PP) |  | 0.279 | 0.009 | 0.005 | 0.03 | 0.031 | 0.008 |

Note: *P<0.05 for each time point within the group compared to baseline. MIP=maximal inspiratory pressure. ITT =Intention-To-Treat. PP=Per-Protocol.

**Table 9**. Comparison of diaphragm excursion

|  | n | Pre-  intervention | Day-1 | Day-5 | Day-7 | Day-10 | the day of successful weaning/Day-28 |
| --- | --- | --- | --- | --- | --- | --- | --- |
| Control group | 30 | 8.92±0.57 | 9.02±0.59* | 10.45±0.57* | 11.18±0.66* | 11.55±0.60* | 10.17±0.91* |
| Study group | 30 | 9.08±0.81 | 9.26±0.85* | 10.80±0.86* | 11.31±0.93* | 11.63±1.12* | 10.53±1.31* |
| t |  | -0.863 | -1.273 | -1.873 | -0.579 | -0.262 | -1.169 |
| P(ITT) |  | 0.392 | 0.208 | 0.066 | 0.565 | 0.795 | 0.248 |
| P(PP) |  | 0.934 | 0.822 | 0.192 | 0.794 | 0.184 | 0.194 |

Note: *P<0.05 for each time point within the group compared to baseline.

**Table 10**. Comparison of DTF

|  | n | Pre-  intervention | Day-1 | Day-5 | Day-7 | Day-10 | the day of successful weaning/Day-28 |
| --- | --- | --- | --- | --- | --- | --- | --- |
| Control group | 30 | 14(12.3,15.7) | 15(13.3,16.7)* | 24.4(21.4,25)* | 29.7(28.6,33.3)* | 35.7(33.3,37.1)* | 36.65(32.1,39.6)* |
| Study group | 30 | 14(13.3,15.7) | 15.3(14.3,20)* | 27.4(23.5,30.8)* | 31.8(28.6,33.3)* | 35.7(33.3,38.5)* | 39.6(33.2,42.8)* |
| z |  | -0.841 | -1.451 | -2.595 | -1.527 | -0.239 | -1.508 |
| P(ITT) |  | 0.400 | 0.147 | 0.009 | 0.127 | 0.811 | 0.132 |
| P(PP) |  | 0.140 | 0.155 | 0.004 | 0.065 | 0.892 | 0.077 |

Note: *P<0.05 for each time point within the group compared to baseline. DTF=diaphragm thickening fraction.

**Table 11**. Comparison of outcome indicator

|  | Control group | Study group | X2/t | P(ITT) | P(PP) |
| --- | --- | --- | --- | --- | --- |
| Duration of mechanical ventilation (day) | 13(9,28) | 10.5(8,28) | 2.245 | 0.025 | 0.015 |
| 28-day weaning success rate (%) |  |  | 0.278 | 0.598 | 0.548 |
| Failure | 13(43.33) | 11(36.67) |  |  |  |
| Success | 17(56.67) | 19(63.33) |  |  |  |
